# Supplementary material for: Epigenetic Mechanisms Regulate MHC and Antigen Processing Molecules in Human Embryonic and Induced Pluripotent Stem Cells
Source: PLoS One. 2010 Apr 16;5(4):e10192. doi: 10.1371/journal.pone.0010192 (PMC2855718; doi:10.1371/journal.pone.0010192)
Supplement: Table S1 — Classification of MHC genes according to their promoter methylation status in hESCs Shef-1, NT2 cell line, iPSC cell line and human fibroblast IMR90. The classification criteria are described in the Methods S1. (0.07 MB XLS) [file pone.0010192.s004.xls]

## Sheet: Sheet 1
Hypermethylated in hESCs ≥ 0.7
Not hypermethylated in hESCs <0.7
													array signal
TargetID	Chr	GID	Accession	Symbol	Gene_ID	CPG_ISLAND_LOCATIONS	Distance_to_TSS	CPG_ISLAND	SOURCE	SYNONYM	ANNOTATION	PRODUCT	hESCs Shef-1	EBs Shef-1	iPSCs MSUH-002	IMR90
cg07163603	6	52426770	NM_002116.5	HLA-A	3105		280	FALSE	CCTTCGGGGCCTGAGACTCTGAGAGCCACGCCTGGGGCCCTGGGACTTCG	HLA A;	MHC class I HLA-A antigen; lymphocyte antigen; HLA class I heavy chain; MHC class I antigen; histocompatibility molecule; MHC class I antigen HLA-A; MHC leukocyte antigen; alpha 2 domain; HLA class I molecule; leucocyte antigen class I; leukocyte antigen-A*0104N; leucocyte antigen A; leucocyte antigen B; MHC class I antigen HLA-A heavy chain; MHC class I antigen heavy chain; antigen presenting mo…	major histocompatibility complex; class I; A precursor	0.5531	0.5726	0.494581	0.443269
cg20879959	6	52426770	NM_002116.5	HLA-A	3105	6:30018048-30019403	123	TRUE	ATTGGCTTCTCTGGAAACCCGACACCCAATGGGAGTGAGAACTGGGTCCG	HLA A;	MHC class I HLA-A antigen; lymphocyte antigen; HLA class I heavy chain; MHC class I antigen; histocompatibility molecule; MHC class I antigen HLA-A; MHC leukocyte antigen; alpha 2 domain; HLA class I molecule; leucocyte antigen class I; leukocyte antigen-A*0104N; leucocyte antigen A; leucocyte antigen B; MHC class I antigen HLA-A heavy chain; MHC class I antigen heavy chain; antigen presenting mo…	major histocompatibility complex; class I; A precursor	0.0907	0.133	0.130589	0.0463857
cg17554194	6	52426771	NM_005514.5	HLA-B	3106	6:31431774-31433237	37	TRUE	CGCACCCACCCGGACTCAGAGTCTCCTCAGACGCCGAGATGCTGGTCATG	B*15; B*35; Cw*01; Cw*03; Cw*08; HLA B; B*1801; B*4601; HLA C*; B antigen;	HLA class I histocompatibility antigen; B alpha chain; MHC cell surface glycoprotein; MHC class I HLA-B heavy chain; MHC HLA-Bw46; MHC class I antigen; leukocyte antigen B; HLA class I histocompatibility antigen B-57; MHC class I antigen HLA-B; MHC class I histocompatibility antigen HLA-B; MHC class I antigen HLA-B heavy chain; leukocyte antigen locus B; antigen presenting molecule; leucocyte ant…	major histocompatibility complex; class I; B	0.0241	0.0276	0.0112981	0.00653862
cg10409680	6	52630341	NM_002117.4	HLA-C	3107	6:31346725-31348137	535	TRUE	CGGCCCGGGTCGCCCAGAGTCTCCCCGTCTGAGATCCACCCCAAGGTGGA	HLC-C; D6S204; Cw*1701; HLA-JY3; FLJ27082;	HLA class I histocompatibility antigen; C alpha chain; MHC class I antigen heavy chain HLA-C; major histocompatibility antigen HLA-C; human leukocyte antigen-C alpha chain; MHC class I protein HLA-C heavy chain; MHC class I HLA-C; leucocyte antigen C; HLA class I heavy chain; leucocyte antigen Cw; MHC class I antigen HLA-C; go_component: membrane; go_component: integral to membrane; go_component:…	major histocompatibility complex; class I; C precursor	0.026	0.0619	0.151164	0.0702782
cg16097079	6	52630341	NM_002117.4	HLA-C	3107	6:31346725-31348137	61	TRUE	CGCTGATTGGCTTCTCTAGAACCCGACACCCAATGGGAGTGGGAATTGGG	HLC-C; D6S204; Cw*1701; HLA-JY3; FLJ27082;	HLA class I histocompatibility antigen; C alpha chain; MHC class I antigen heavy chain HLA-C; major histocompatibility antigen HLA-C; human leukocyte antigen-C alpha chain; MHC class I protein HLA-C heavy chain; MHC class I HLA-C; leucocyte antigen C; HLA class I heavy chain; leucocyte antigen Cw; MHC class I antigen HLA-C; go_component: membrane; go_component: integral to membrane; go_component:…	major histocompatibility complex; class I; C precursor	0.0255	0.0237	0.0429965	0.0149678
cg14833385	6	18765714	NM_006120.2	HLA-DMA	3108		289	FALSE	TTGCAGCATTCTGCCAGGAGGTGGCACTGCTCTGAAGAGCCAGCTGGTCG	DMA; HLADM; RING6; D6S222E;	class II histocompatibility antigen; M alpha chain; go_component: membrane; go_component: integral to membrane; go_function: protein binding; go_function: MHC class II receptor activity; go_function: MHC class II receptor activity; go_process: immune response; go_process: antigen presentation; exogenous antigen; go_process: detection of pest; pathogen or parasite; go_process: antigen processing; …	major histocompatibility complex; class II; DM alpha precursor	0.1315	0.1321	0.136582	0.124046
cg24421410	6	18765714	NM_006120.2	HLA-DMA	3108		633	FALSE	CATAACTGCATAAAATAATCCCTCTTCTTTGAAGCTCTTGGCAGGAATCG	DMA; HLADM; RING6; D6S222E;	class II histocompatibility antigen; M alpha chain; go_component: membrane; go_component: integral to membrane; go_function: protein binding; go_function: MHC class II receptor activity; go_function: MHC class II receptor activity; go_process: immune response; go_process: antigen presentation; exogenous antigen; go_process: detection of pest; pathogen or parasite; go_process: antigen processing; …	major histocompatibility complex; class II; DM alpha precursor	0.801	0.6115	0.758277	0.634143
cg00575744	6	18641376	NM_002118.3	HLA-DMB	3109		175	FALSE	CGGACCCTGGAAGAGCTGGTCCAGGGGACTGAACTCCCGGCATCTTTACA	RING7; D6S221E;	HLA class II alpha chain-like; class II histocompatibility antigen; M beta chain; MHC class II HLA-DMB; MHC class II antigen HLA-DM beta chain; go_component: membrane; go_component: integral to membrane; go_function: MHC class II receptor activity; go_process: immune response; go_process: antigen presentation; exogenous antigen; go_process: detection of pest; pathogen or parasite; go_process: ant…	major histocompatibility complex; class II; DM beta precursor	0.7618	0.5084	0.613136	0.27109
cg10714284	6	18641376	NM_002118.3	HLA-DMB	3109		84	FALSE	GACAAATCACTGAGTGCCTCAGCCTAGCATCATCAGTTACTAGGTAAACG	RING7; D6S221E;	HLA class II alpha chain-like; class II histocompatibility antigen; M beta chain; MHC class II HLA-DMB; MHC class II antigen HLA-DM beta chain; go_component: membrane; go_component: integral to membrane; go_function: MHC class II receptor activity; go_process: immune response; go_process: antigen presentation; exogenous antigen; go_process: detection of pest; pathogen or parasite; go_process: ant…	major histocompatibility complex; class II; DM beta precursor	0.5043	0.3238	0.498336	0.180372
cg26643856	6	62912477	NM_002119.3	HLA-DOA	3111		40	FALSE	CGGACTGAGACTGATTTGATTAAAGCACCAGAGTGTAATGGCCCTCAGAG	HLADZ; HLA-DNA; HLA-DZA;	major histocompatibility complex; class II; DN alpha; lymphocyte antigen; HLA-D0-alpha; MHC class II antigen; go_component: plasma membrane; go_component: integral to membrane; go_function: MHC class II receptor activity; go_process: immune response; go_process: antigen presentation; exogenous antigen; go_process: antigen processing; exogenous antigen via MHC class II	major histocompatibility complex; class II; DO alpha precursor	0.0322	0.0382	0.0349708	0.0215136
cg04576021	6	18641377	NM_002120.2	HLA-DOB	3112		529	FALSE	CGGAAACAAATCTCAGTTGGGGTATATGTGGACAAATGAAACTGGAAACA	DOB;	HLA class II histocompatibility antigen; DO beta chain; class II beta chain; go_component: membrane; go_component: integral to membrane; go_function: MHC class II receptor activity; go_process: immune response; go_process: antigen presentation; exogenous antigen; go_process: antigen processing; exogenous antigen via MHC class II	major histocompatibility complex; class II; DO beta precursor	0.8501	0.8221	0.784797	0.840569
cg17103109	6	18641377	NM_002120.2	HLA-DOB	3113		357	FALSE	GCTTAATTTACATACTCTTAATTCCTTCTTAATTTACACACTGCCTGTCG	DOB;	HLA class II histocompatibility antigen; DO beta chain; class II beta chain; go_component: membrane; go_component: integral to membrane; go_function: MHC class II receptor activity; go_process: immune response; go_process: antigen presentation; exogenous antigen; go_process: antigen processing; exogenous antigen via MHC class II	major histocompatibility complex; class II; DO beta precursor	0.8646	0.7418	0.812919	0.797593
cg13906813	6	24797073	NM_033554.2	HLA-DPA1	3113		464	FALSE	CGAGCCAAGTTTGAAGTCCAGACCCAGCTCTGAGGGTCATACACTGCCTT	HLADP; HLASB; HLA-DP1A;	HLA class II histocompatibility antigen; DP alpha chain; MHC class II HLA-DPA1 antigen; MHC class II antigen; go_component: membrane; go_component: integral to plasma membrane; go_function: MHC class II receptor activity; go_process: immune response; go_process: antigen presentation; exogenous antigen; go_process: antigen processing; exogenous antigen via MHC class II	major histocompatibility complex; class II; DP alpha 1 precursor	0.8641	0.7448	0.864419	0.474693
cg12365667	6	24797075	NM_002121.4	HLA-DPB1	3115		216	FALSE	CGTCCCCTAGGAATTGTTCCCTGAGCCAGACCCTCCAAGAATGGCAGTTC	DPB1; HLA-DP1B; MHC DPB1;	HLA-DP histocompatibility type; beta-1 subunit; MHC class II antigen beta chain; MHC class II HLA-DP-beta-1; HLA DP14-beta chain; MHC HLA DPB1; lymphocyte antigen; light chain; MHC class II antigen DPbeta1; MHC class II anitgen; beta1 domain MHC class II HLA DPB; MHC class II HLA-DRB1; major histocompatibility complex class II HLA DPB1 protein; MHC class II antigen DP beta 1 chain; go_component: …	major histocompatibility complex; class II; DP beta 1 precursor	0.6062	0.5321	0.526988	0.230312
cg19921353	6	24797075	NM_002121.4	HLA-DPB1	3115		186	FALSE	CGGAGGAAAGACAGTGATACTCATTTTAACCAGTCAGATAAGTCATGATG	DPB1; HLA-DP1B; MHC DPB1;	HLA-DP histocompatibility type; beta-1 subunit; MHC class II antigen beta chain; MHC class II HLA-DP-beta-1; HLA DP14-beta chain; MHC HLA DPB1; lymphocyte antigen; light chain; MHC class II antigen DPbeta1; MHC class II anitgen; beta1 domain MHC class II HLA DPB; MHC class II HLA-DRB1; major histocompatibility complex class II HLA DPB1 protein; MHC class II antigen DP beta 1 chain; go_component: …	major histocompatibility complex; class II; DP beta 1 precursor	0.7769	0.5636	0.775262	0.256302
cg22282941	6	56710315	NM_020056.2	HLA-DQA2	3118		348	FALSE	ACACAGACCTCCAGGCTATAGTCTCTGGATATAATATAAACAGAACAACG	HLA-DXA; DQ alpha;	go_component: membrane; go_component: integral to plasma membrane; go_function: MHC class II receptor activity; go_function: MHC class II receptor activity; go_process: immune response; go_process: immune response; go_process: antigen presentation; exogenous antigen; go_process: antigen processing; exogenous antigen via MHC class II	major histocompatibility complex; class II; DQ alpha 2	0.5087	0.5481	0.501504	0.08
cg01889448	6	24797068	NM_002123.2	HLA-DQB1	3119		1430	FALSE	TGCTCTAGAATTATGCACTGAATAATACAGAATATTGGAGTGGCTCAACG	IDDM1; CELIAC1; HLA-DQB; HLA DQB1;	MHC class II cell surface protein; MHC class II HLA-DQ beta glycoprotein; MHC class II antigen HLA-DQ-beta-1; MHC DQ beta protein; MHC class II antigen variant; MHC class2 antigen; major histocompatibility complex class II beta chain; lymphocyte antigen; go_component: membrane; go_component: membrane; go_component: integral to membrane; go_function: MHC class I receptor activity; go_function: MHC…	major histocompatibility complex; class II; DQ beta 1 precursor	0.775	0.7601	0.679264	0.384892
cg04345908	6	33438593	NM_182549.1	HLA-DQB2	3120		60	FALSE	CGGCAGGTACATAAGATCCATTAGGTTTGAGCTGTGTTGACTACCACTGC	HLA-DXB;	DV19.1 (major histocompatibility complex; class II; DQ beta 2 (HLA-DXB)); go_component: membrane; go_component: membrane; go_component: integral to membrane; go_function: MHC class II receptor activity; go_function: MHC class II receptor activity; go_process: immune response; go_process: immune response; go_process: antigen presentation; exogenous antigen; go_process: antigen processing; exogenou…	major histocompatibility complex; class II; DQ beta 2	0.8955	0.8347	0.884774	0.812406
cg16899306	6	33438593	NM_182549.1	HLA-DQB2	3120		1318	FALSE	CGGTAGCAAGAGGTTTGCAATAGTGGCACATGAAAGCATTGAGCCACTCT	HLA-DXB;	DV19.1 (major histocompatibility complex; class II; DQ beta 2 (HLA-DXB)); go_component: membrane; go_component: membrane; go_component: integral to membrane; go_function: MHC class II receptor activity; go_function: MHC class II receptor activity; go_process: immune response; go_process: immune response; go_process: antigen presentation; exogenous antigen; go_process: antigen processing; exogenou…	major histocompatibility complex; class II; DQ beta 2	0.863	0.7805	0.754647	0.369617
cg19248557	6	52426773	NM_019111.3	HLA-DRA	3122		191	FALSE	TATCTTCCAAATGTCCATAGGTCTTTTCTCCAATGCTTCGTAGTCTATCG	HLA-DRA1;	HLA class II histocompatibility antigen; DR alpha chain; MHC cell surface glycoprotein; histocompatibility antigen HLA-DR alpha; go_component: membrane; go_component: lysosome; go_component: plasma membrane; go_component: integral to plasma membrane; go_component: integral to plasma membrane; go_function: MHC class II receptor activity; go_function: MHC class II receptor activity; go_function: MH…	major histocompatibility complex; class II; DR alpha precursor	0.7629	0.7435	0.843141	0.570182
cg25764570	6	52426773	NM_019111.3	HLA-DRA	3127		358	FALSE	CCATGGCCTGACAATTTACCTTCTATTTGGGTAATTTATTGTCCCTTACG	HLA-DRA1;	HLA class II histocompatibility antigen; DR alpha chain; MHC cell surface glycoprotein; histocompatibility antigen HLA-DR alpha; go_component: membrane; go_component: lysosome; go_component: plasma membrane; go_component: integral to plasma membrane; go_component: integral to plasma membrane; go_function: MHC class II receptor activity; go_function: MHC class II receptor activity; go_function: MH…	major histocompatibility complex; class II; DR alpha precursor	0.8273	0.8242	0.862833	0.75625
cg10746737	6	26665892	NM_002125.3	HLA-DRB5	2133		598	FALSE	CGCCTGAAGGAGCAGCAGCCCCGGGTATCTGATAATATGACAGAATGACA		HLA class II histocompatibility antigen; DR-5 beta chain; MHC HLA-DR-beta cell surface glycoprotein; MHC class II antigen; MHC HLA-DR-beta chain; human leucocyte antigen DRB5; go_component: membrane; go_component: integral to membrane; go_component: integral to plasma membrane; go_function: MHC class II receptor activity; go_function: MHC class II receptor activity; go_process: immune response; g…	major histocompatibility complex; class II; DR beta 5 precursor	0.8572	0.7899	0.801176	0.608074
cg17475918	6	62912478	NM_005516.4	HLA-E	3134	6:30564849-30566281	34	TRUE	CGCTGATTGGCTTCTCTAGAAACCCGACACCCATTGGGAATGAGAACTGA	MHC; EA1.2; EA2.1; HLA-6.2; DKFZp686P19218;	HLA class I histocompatibility antigen; E alpha chain; lymphocyte antigen; MHC HLA-E alpha-1; MHC HLA-E alpha-2.1; MHC class I antigen; go_component: integral to membrane; go_component: MHC class I protein complex; go_function: MHC class I receptor activity; go_function: MHC class I receptor activity; go_process: antigen presentation; go_process: antigen presentation; endogenous antigen; go_proce…	major histocompatibility complex; class I; E precursor	0.0526	0.1054	0.0994211	0.0385444
cg14402472	6	9665231	NM_018950.1	HLA-F	3134	6:29798950-29800261	76	TRUE	CGCCGCAGTTCCCAGGTTCTAAAGTCCCACGCACCCCGCGGGACTCATAT	HLAF; HLA-5.4; HLA-CDA12;	HLA class I molecule; MHC class Ib antigen; corresponding to 1136-1371 nucleotides in HLA-F; go_component: integral to membrane; go_component: MHC class I protein complex; go_function: MHC class I receptor activity; go_function: MHC class I receptor activity; go_process: antigen presentation; go_process: antigen presentation; endogenous antigen; go_process: antigen processing; endogenous antigen …	major histocompatibility complex; class I; F precursor	0.0145	0.0586	0.0297077	0.0216019
cg24703717	6	9665231	NM_018950.1	HLA-F	3135	6:29798950-29800261	73	TRUE	AAAATATGAGTCCCGCGGGGTGCGTGGGACTTTAGAACCTGGGAACTGCG	HLAF; HLA-5.4; HLA-CDA12;	HLA class I molecule; MHC class Ib antigen; corresponding to 1136-1371 nucleotides in HLA-F; go_component: integral to membrane; go_component: MHC class I protein complex; go_function: MHC class I receptor activity; go_function: MHC class I receptor activity; go_process: antigen presentation; go_process: antigen presentation; endogenous antigen; go_process: antigen processing; endogenous antigen …	major histocompatibility complex; class I; F precursor	0.0296	0.0467	0.0345592	0.0314132
cg21529533	6	24797072	NM_002127.3	HLA-G	3135	6:29903354-29904626	497	TRUE	CGGAACACCAAGGCCCACGCACAGACTGACAGAATGAACCTGCAGACCCT	MHC-G;	major histocompatibility complex; class I; G; MHC class I antigen; HLA class I molecule; go_component: membrane; go_component: integral to membrane; go_component: MHC class I protein complex; go_function: MHC class I receptor activity; go_function: MHC class I receptor activity; go_function: MHC class I receptor activity; go_process: antigen presentation; go_process: cellular defense response; go…	major histocompatibility complex; class I; G precursor	0.0156	0.0601	0.0154389	0.0284395
cg03355298	15	37704380	NM_004048.2	B2M	567	15:42790598-42791777	19	TRUE	CGCGACGCCTCCACTTATATTAAACGCGTGCCCAGCCAATCAGGACAAGG		beta chain of MHC class I molecules; beta-2-microglobin; go_component: extracellular region; go_function: MHC class I receptor activity; go_process: immune response; go_process: immune response; go_process: antigen presentation; endogenous antigen; go_process: antigen processing; endogenous antigen via MHC class I	beta-2-microglobulin precursor	0.0123	0.0233	0.0331693	0.0057824
cg08350173	15	37704380	NM_004048.2	B2M	567	15:42790598-42791777	7	TRUE	TGGAGACAGGTGACGGTCCCTGCGGGCCTTGTCCTGATTGGCTGGGCACG		beta chain of MHC class I molecules; beta-2-microglobin; go_component: extracellular region; go_function: MHC class I receptor activity; go_process: immune response; go_process: immune response; go_process: antigen presentation; endogenous antigen; go_process: antigen processing; endogenous antigen via MHC class I	beta-2-microglobulin precursor	0.041	0.0294	0.0668996	0.0105534
cg03465320	6	53759115	NM_000593.5	TAP1	6890		1330	FALSE	CGACTTATGCAAAGTCACACAGAGTTAATAGTAGACCTGGGACTAAAATT	APT1; PSF1; ABC17; ABCB2; RING4; TAP1N; D6S114E; TAP1*0102N;	antigen peptide transporter 1; transporter; ATP-binding cassette; major histocompatibility complex; 1; ABC transporter; MHC 1; peptide supply factor 1; ATP-binding cassette; sub-family B (MDR/TAP); member 2; ATP-binding cassette; sub-family B; member 2; ATP-binding cassette transporter; transporter associated with antigen processing; go_component: integral to membrane; go_component: endoplasmic r…	transporter 1; ATP-binding cassette; sub-family B	0.6422	0.549	0.421663	0.604938
cg16853860	6	53759115	NM_000593.5	TAP1	6890		1368	FALSE	CGGTTCAAATGAGGAAACCAAGTCACAGAAAATGCAAACGACTTATGCAA	APT1; PSF1; ABC17; ABCB2; RING4; TAP1N; D6S114E; TAP1*0102N;	antigen peptide transporter 1; transporter; ATP-binding cassette; major histocompatibility complex; 1; ABC transporter; MHC 1; peptide supply factor 1; ATP-binding cassette; sub-family B (MDR/TAP); member 2; ATP-binding cassette; sub-family B; member 2; ATP-binding cassette transporter; transporter associated with antigen processing; go_component: integral to membrane; go_component: endoplasmic r…	transporter 1; ATP-binding cassette; sub-family B	0.8066	0.7061	0.671711	0.72327
cg14493899	6	73747914	NM_000544.3	TAP2	6891	6:32913936-32915453	827	TRUE	AGGTGCGCCCAACATAATTTGGAGTACAGACTCAGAGGCACCTGAACACG	APT2; PSF2; ABC18; ABCB3; RING11; D6S217E;	isoform 1 is encoded by transcript variant 1; antigen peptide transporter 2; peptide supply factor 2; peptide transporter PSF2; ABC transporter; MHC 2; transporter 2; ABC (ATP binding cassette); ATP-binding cassette; sub-family B (MDR/TAP); member 3; go_component: cytosol; go_component: TAP complex; go_component: cytosol; go_component: TAP complex; go_component: integral to membrane; go_component…	transporter 2; ATP-binding cassette; sub-family B isoform 1	0.9249	0.8791	0.699342	0.898124
cg19221044	6	73747914	NM_000544.3	TAP2	6891	6:32913936-32915453	380	TRUE	CGGATGAGCACCGGTTACTCAGGAGAGCTCTCAGGGTTGAATAGGATAAA	APT2; PSF2; ABC18; ABCB3; RING11; D6S217E;	isoform 1 is encoded by transcript variant 1; antigen peptide transporter 2; peptide supply factor 2; peptide transporter PSF2; ABC transporter; MHC 2; transporter 2; ABC (ATP binding cassette); ATP-binding cassette; sub-family B (MDR/TAP); member 3; go_component: cytosol; go_component: TAP complex; go_component: cytosol; go_component: TAP complex; go_component: integral to membrane; go_component…	transporter 2; ATP-binding cassette; sub-family B isoform 1	0.0375	0.0451	0.0381474	0.0174598
cg13859478	5	66933003	NM_001746.3	CANX	821	5:179057805-179059110	503	TRUE	CGGCTGCCCAGGCAGCCGGCAAAGAGGCCTAAGAAAGCCCTAGAAGCAAA	CNX; P90; IP90;	major histocompatibility complex class I antigen-binding protein p88; go_component: integral to membrane; go_component: endoplasmic reticulum; go_component: endoplasmic reticulum; go_function: sugar binding; go_function: calcium ion binding; go_function: calcium ion binding; go_function: unfolded protein binding; go_function: unfolded protein binding; go_process: protein folding; go_process: prot…	calnexin precursor	0.0409	0.0425	0.128678	0.0226943
cg16940108	5	66933003	NM_001746.3	CANX	821	5:179057805-179059110	703	TRUE	TAAAATGGTGGCGTATCTTAAATCTTTCCATGGCACCATCCTTTCTCTCG	CNX; P90; IP90;	major histocompatibility complex class I antigen-binding protein p88; go_component: integral to membrane; go_component: endoplasmic reticulum; go_component: endoplasmic reticulum; go_function: sugar binding; go_function: calcium ion binding; go_function: calcium ion binding; go_function: unfolded protein binding; go_function: unfolded protein binding; go_process: protein folding; go_process: prot…	calnexin precursor	0.215	0.1186	0.154244	0.0329986
cg01678893	19	5921996	NM_004343.2	CALR	811	19:12909908-12911465	526	TRUE	CGGGTGGACTTCCCGCTGGATCGAATCCAAACACAAGTCAGATTTTGGCA	RO; SSA; cC1qR;	Sicca syndrome antigen A (autoantigen Ro; calreticulin); go_component: cytosol; go_component: endoplasmic reticulum lumen; go_function: sugar binding; go_function: DNA binding; go_function: zinc ion binding; go_function: calcium ion binding; go_function: unfolded protein binding; go_process: protein folding; go_process: calcium ion homeostasis; go_process: regulation of apoptosis; go_process: pro…	calreticulin precursor	0.0165	0.0318	0.040319	0.00562215
cg11228872	19	5921996	NM_004343.2	CALR	811	19:12909908-12911465	164	TRUE	CGCTGGGTTCCCAGATGGCCGATTTCTATTGGCCTCACCACCGACCAATG	RO; SSA; cC1qR;	Sicca syndrome antigen A (autoantigen Ro; calreticulin); go_component: cytosol; go_component: endoplasmic reticulum lumen; go_function: sugar binding; go_function: DNA binding; go_function: zinc ion binding; go_function: calcium ion binding; go_function: unfolded protein binding; go_process: protein folding; go_process: calcium ion homeostasis; go_process: regulation of apoptosis; go_process: pro…	calreticulin precursor	0.0262	0.0341	0.0306038	0.00600792
cg06975739	6	27436892	NM_003190.3	TAPBP	6892	6:33388992-33390235	169	TRUE	TATTGGTCATTTACTTGGCTTCCCGATAACCCGTGTGTTTGCTGGGGACG	TPN; TAPA; TPSN; NGS17;	isoform 1 precursor is encoded by transcript variant 1; TAP-binding protein; TAP-associated protein; go_component: membrane; go_component: microsome; go_component: Golgi membrane; go_component: integral to membrane; go_component: endoplasmic reticulum membrane; go_component: MHC class I peptide loading complex; go_function: TAP1 binding; go_function: TAP2 binding; go_function: peptide antigen bin…	tapasin isoform 1 precursor	0.0938	0.0774	0.229317	0.0325203
cg26315802	6	27436892	NM_003190.3	TAPBP	6892	6:33388992-33390235	17	TRUE	CGGGTCCCTGCCTGGCCAGTGGGGAAACACCGGTCCCCCAGGCACCTTCA	TPN; TAPA; TPSN; NGS17;	isoform 1 precursor is encoded by transcript variant 1; TAP-binding protein; TAP-associated protein; go_component: membrane; go_component: microsome; go_component: Golgi membrane; go_component: integral to membrane; go_component: endoplasmic reticulum membrane; go_component: MHC class I peptide loading complex; go_function: TAP1 binding; go_function: TAP2 binding; go_function: peptide antigen bin…	tapasin isoform 1 precursor	0.1044	0.0889	0.0640421	0.0494561
cg03377682	15	67083697	NM_005313.4	PDIA3	2923	15:41825475-41826557	36	TRUE	ACAGCGGCCCAAGCCGGGTTTGGGGGTTGGGACCTCCGGCTGCAGGTCCG	P58; ERp57; ERp60; ERp61; GRP57; GRP58; PI-PLC; HsT17083;	glucose regulated protein; 58kDa; protein disulfide isomerase-associated 3; 58 kDa microsomal protein; endoplasmic reticulum P58; phospholipase C-alpha; go_component: endoplasmic reticulum; go_function: isomerase activity; go_function: phospholipase C activity; go_function: electron transporter activity; go_function: cysteine-type endopeptidase activity; go_function: protein disulfide isomerase a…	protein disulfide isomerase-associated 3 precursor	0.0769	0.0806	0.141852	0.0608029
cg12737574	15	67083697	NM_005313.4	PDIA3	2923	15:41825475-41826557	258	TRUE	CGCAGGACGAGCTCAGGGCCGGCTCCCAGCCTCACTGCGCCCCATTTCCC	P58; ERp57; ERp60; ERp61; GRP57; GRP58; PI-PLC; HsT17083;	glucose regulated protein; 58kDa; protein disulfide isomerase-associated 3; 58 kDa microsomal protein; endoplasmic reticulum P58; phospholipase C-alpha; go_component: endoplasmic reticulum; go_function: isomerase activity; go_function: phospholipase C activity; go_function: electron transporter activity; go_function: cysteine-type endopeptidase activity; go_function: protein disulfide isomerase a…	protein disulfide isomerase-associated 3 precursor	0.0184	0.0454	0.0593315	0.00692537
cg01351032	16	73747680	NM_000246.2	CIITA	4261		134	FALSE	CCTTGGGGCTCTGACAGGTAGGACCCAGCAGGGCGTGGAGCCAGGCAACG	C2TA; MHC2TA; CIITA IV;	MHC class II transactivator; MHC class II transactivator type III; go_component: nucleus; go_function: ATP binding; go_function: DNA binding; go_function: nucleotide binding; go_function: ubiquitin binding; go_function: transcription regulator activity; go_function: transcription coactivator activity; go_function: RNA polymerase II transcription factor activity; go_process: immune response; go_pr…	class II transactivator	0.8403	0.8215	0.702046	0.262814
cg26239233	16	73747680	NM_000246.2	CIITA	4261		256	FALSE	ATTGGCAGCTGGCACCAGTGCGGTTCCATTGTGATCATCATTTCTGAACG	C2TA; MHC2TA; CIITA IV;	MHC class II transactivator; MHC class II transactivator type III; go_component: nucleus; go_function: ATP binding; go_function: DNA binding; go_function: nucleotide binding; go_function: ubiquitin binding; go_function: transcription regulator activity; go_function: transcription coactivator activity; go_function: RNA polymerase II transcription factor activity; go_process: immune response; go_pr…	class II transactivator	0.9211	0.7913	0.706818	0.366391
cg00123035	1	71040087	NM_000449.3	RFX5	5993	1:149585810-149586785	231	TRUE	CGGGCACGTGCACATGGGTGAAGAAGCTGTTGAAAATACAGCTACAATCT		go_component: nucleus; go_function: transcription coactivator activity; go_function: transcription factor activity; go_process: transcription; go_process: regulation of transcription; DNA-dependent; go_process: transcription from RNA polymerase II promoter	regulatory factor X; 5	0.025	0.0637	0.097504	0.0152049
cg04900486	1	71040087	NM_000449.3	RFX5	5993	1:149585810-149586785	348	TRUE	CGGTCCTCAGAGCTGCCGGAAGAGAAGAATCAATGGATGATAAAATAACT		go_component: nucleus; go_function: transcription coactivator activity; go_function: transcription factor activity; go_process: transcription; go_process: regulation of transcription; DNA-dependent; go_process: transcription from RNA polymerase II promoter	regulatory factor X; 5	0.0642	0.0817	0.0932448	0.0306262
cg02841886	19	52486542	NM_002918.3	RFX1	5989	19:13977452-13979154	3	TRUE	CGGTAGTCGTGGCGACCAAGCAACCCGGCAACGCGAGTCAACAACAACAA	EF-C;	trans-acting regulatory factor 1; enhancer factor C; MHC class II regulatory factor RFX; go_component: nucleus; go_function: DNA binding; go_function: transcription regulator activity; go_function: RNA polymerase II transcription factor activity; enhancer binding; go_process: immune response; go_process: regulation of transcription; DNA-dependent	regulatory factor X1	0.0131	0.0225	0.0489848	0.00249525
cg17725461	19	52486542	NM_002918.3	RFX1	5989	19:13977452-13979154	153	TRUE	TGATTGGACGGCGCCAGGCCTTGCAGCTAAACTATTAGTTCCGATGCACG	EF-C;	trans-acting regulatory factor 1; enhancer factor C; MHC class II regulatory factor RFX; go_component: nucleus; go_function: DNA binding; go_function: transcription regulator activity; go_function: RNA polymerase II transcription factor activity; enhancer binding; go_process: immune response; go_process: regulation of transcription; DNA-dependent	regulatory factor X1	0.0202	0.0502	0.0732707	0.0093737
cg04747510	6	4557750	NM_000247.1	MICA	4276	6:31478737-31479924	448	TRUE	AACAGGTCTGCAAATCTGGTCACTGGTCTCATTGCCAGTAACGCTGTGCG	PERB11.1; MGC111087; truncated;	HLA class I alpha chain; MHC class I-like molecule PERB11.1-13.1; MHC class I-like molecule PERB11.1-18.2; MHC class I-like molecule PERB11.1-35.1; MHC class I-like molecule PERB11.1-44.1; MHC class I-like molecule PERB11.1-44.3; MHC class I-like molecule PERB11.1-46.1; MHC class I-like molecule PERB11.1-47.1; MHC class I-like molecule PERB11.1-52.1; MHC class I-like molecule PERB11.1-54.1; MHC c…	MHC class I chain-related gene A protein	0.0673	0.0723	0.118052	0.113293
cg14228840	6	4557750	NM_000247.1	MICA	4276	6:31478737-31479924	117	TRUE	CGCCACTCACCAGCAGCAGCTCCCGGAGGTGCAAAAGGGAAGATGCCAGC	PERB11.1; MGC111087; truncated;	HLA class I alpha chain; MHC class I-like molecule PERB11.1-13.1; MHC class I-like molecule PERB11.1-18.2; MHC class I-like molecule PERB11.1-35.1; MHC class I-like molecule PERB11.1-44.1; MHC class I-like molecule PERB11.1-44.3; MHC class I-like molecule PERB11.1-46.1; MHC class I-like molecule PERB11.1-47.1; MHC class I-like molecule PERB11.1-52.1; MHC class I-like molecule PERB11.1-54.1; MHC c…	MHC class I chain-related gene A protein	0.0195	0.0309	0.0112782	0.00441045
cg05399360	6	26787987	NM_005931.2	MICB	4277	6:31573251-31574789	37	TRUE	CGGCCAGAAACAGCAGGACCCGGCCCAGCCCCATGGCCCCTACGTCGCCA	PERB11.2;	MHC class I-like molecule PERB11.2-IMX; stress inducible class I homolog; MHC class I molecule; MHC class I mic-B antigen; MHC class I chain-related protein B; go_component: MHC class I protein complex; go_function: protein binding; go_function: MHC class I receptor activity; go_process: antigen presentation; go_process: cell recognition; go_process: response to stress; go_process: cellular defen…	MHC class I polypeptide-related sequence B	0.021	0.0221	0.0194568	0.0142066
cg02409282	6	56181385	NM_025218.2	ULBP1	80329	6:150326250-150328321	12	TRUE	GGCAGCTTTATAAACAGCCGTGGTGTGAGCCTCGAAGGGAACCATCAGCG	RAET1I;	alcan-beta; go_component: membrane; go_component: endoplasmic reticulum; go_component: MHC class I protein complex; go_function: MHC class I receptor activity; go_process: antigen presentation; go_process: natural killer cell activation	UL16 binding protein 1	0.0382	0.0692	0.033859	0.0316205
cg25589890	6	56181385	NM_025218.2	ULBP1	80329	6:150326250-150328321	366	TRUE	AAGAAACTTGCATAGGAATACTCAGTGGCGGCGGTGTCTCCCTGTCACCG	RAET1I;	alcan-beta; go_component: membrane; go_component: endoplasmic reticulum; go_component: MHC class I protein complex; go_function: MHC class I receptor activity; go_process: antigen presentation; go_process: natural killer cell activation	UL16 binding protein 1	0.0458	0.0574	0.0205391	0.0513012
cg03985136	6	20070345	NM_025217.2	ULBP2	80328	6:150304015-150305371	402	TRUE	CGCCAGTTCCCAGTGGACGTGATTACAGTCCGGGCTAGGTTTTATTATTT	N2DL2; RAET1H;	UL16-binding protein 2; ALCAN-alpha; retinoic acid early transcript 1 H; NKG2D ligand 2; go_component: membrane; go_component: MHC class I protein complex; go_function: MHC class I receptor activity; go_process: antigen presentation; go_process: natural killer cell activation	UL16 binding protein 2	0.0199	0.0572	0.109884	0.0393915
cg12808992	6	20070345	NM_025217.2	ULBP2	80328	6:150304015-150305371	218	TRUE	ATGGAGCCTAAGCCGGGCGGGGACCAAGCCTGGAGGGCTGTGAACTGCCG	N2DL2; RAET1H;	UL16-binding protein 2; ALCAN-alpha; retinoic acid early transcript 1 H; NKG2D ligand 2; go_component: membrane; go_component: MHC class I protein complex; go_function: MHC class I receptor activity; go_process: antigen presentation; go_process: natural killer cell activation	UL16 binding protein 2	0.0479	0.0488	0.0690428	0.0304323
cg18071006	6	13375655	NM_024518.1	ULBP3	79465	6:150431485-150432470	51	TRUE	GAGCACACTCAATCACTAGCTGGCATGCGAGGGCCGAAGTGATTCATACG	RAET1N;	UL16-binding protein 3; go_component: membrane; go_component: MHC class I protein complex; go_function: MHC class I receptor activity; go_process: antigen presentation; go_process: natural killer cell activation	UL16 binding protein 3	0.0171	0.0414	0.0308957	0.00967002
cg18418460	6	13375655	NM_024518.1	ULBP3	79465	6:150431485-150432470	188	TRUE	AAAGAGCAGCGAATCGGAACTGAGCGTGGGGGCAGTCCGGGGAGATCGCG	RAET1N;	UL16-binding protein 3; go_component: membrane; go_component: MHC class I protein complex; go_function: MHC class I receptor activity; go_process: antigen presentation; go_process: natural killer cell activation	UL16 binding protein 3	0.0266	0.0347	0.0178587	0.00347329
cg07504780	6	73747923	NM_002800.4	PSMB9	5698	6:32928757-32930456	254	TRUE	AAAATTGGGCACCAGGGCTGCTCCCGAGATTCTCAGATCTGATTTCCACG	LMP2; RING12; MGC70470;	isoform 1 proprotein is encoded by transcript variant 1; proteasome-related gene 2; proteasome chain 7; macropain chain 7; low molecular mass protein 2; multicatalytic endopeptidase complex chain 7; proteasome catalytic subunit 1i; proteasome subunit beta 6i; proteasome (prosome; macropain) subunit; beta type; 9 (large multifunctional protease 2); go_component: proteasome core complex (sensu Euka…	proteasome beta 9 subunit isoform 1 proprotein	0.0377	0.074	0.0617029	0.0256058
cg12762680	6	73747923	NM_002800.4	PSMB9	5698	6:32928757-32930456	408	TRUE	GGTGCTTTGACTCTTAGCTGGAAGCGTCAACGGGAAGCTACTCTAAAGCG	LMP2; RING12; MGC70470;	isoform 1 proprotein is encoded by transcript variant 1; proteasome-related gene 2; proteasome chain 7; macropain chain 7; low molecular mass protein 2; multicatalytic endopeptidase complex chain 7; proteasome catalytic subunit 1i; proteasome subunit beta 6i; proteasome (prosome; macropain) subunit; beta type; 9 (large multifunctional protease 2); go_component: proteasome core complex (sensu Euka…	proteasome beta 9 subunit isoform 1 proprotein	0.2255	0.2182	0.221443	0.0509936
cg15451100	6	73747873	NM_004159.4	PSMB8	5696	6:32919367-32920736	290	TRUE	GGGTTTAGAGGCGTGAAACTCCGCAGTGCTCAGCCAAGCAGGGAGCAACG	LMP7; D6S216; RING10; D6S216E; MGC1491;	isoform E1 proprotein is encoded by transcript variant 1; proteasome (prosome; macropain) subunit; beta type; 8 (large multifunctional protease 7); proteasome catalytic subunit 3i; proteasome subunit beta 5i; proteasome subunit Y2; low molecular weight protein 7; proteasome-related gene 7; multicatalytic endopeptidase complex subunit C13; macropain subunit C13; protease component C13; go_componen…	proteasome beta 8 subunit isoform E1 proprotein	0.0364	0.0343	0.0723874	0.00943571
cg16890093	6	73747873	NM_004159.4	PSMB8	5696		372	FALSE	CGGAAAGATGATCAGCTATTTTCAACATAACTGAAGGCATATGCTGGCCC	LMP7; D6S216; RING10; D6S216E; MGC1491;	isoform E1 proprotein is encoded by transcript variant 1; proteasome (prosome; macropain) subunit; beta type; 8 (large multifunctional protease 7); proteasome catalytic subunit 3i; proteasome subunit beta 5i; proteasome subunit Y2; low molecular weight protein 7; proteasome-related gene 7; multicatalytic endopeptidase complex subunit C13; macropain subunit C13; protease component C13; go_componen…	proteasome beta 8 subunit isoform E1 proprotein	0.8407	0.7798	0.766677	0.855518

## Sheet: Short
Hypermethylated in hESCs ≥ 0.7
Not hypermethylated in hESCs <0.7
	hESCs Shef-1	EBs Shef-1	iPSCs	IMR90
HLA-A	0.3219	0.3528	0.312585	0.244827
HLA-B	0.0241	0.0276	0.0112981	0.00653862
HLA-C	0.02575	0.0428	0.0970802	0.042623
HLA-DMA	0.46625	0.3718	0.44743	0.379094
HLA-DMB	0.63305	0.4161	0.555736	0.225731
HLA-DOA	0.0322	0.0382	0.0349708	0.0215136
HLA-DOB	0.85735	0.78195	0.798858	0.819081
HLA-DPA1	0.8641	0.7448	0.864419	0.474693
HLA-DPB1	0.69155	0.54785	0.651125	0.243307
HLA-DQA2	0.5087	0.5481	0.501504	0.08
HLA-DQB1	0.775	0.7601	0.679264	0.384892
HLA-DQB2	0.87925	0.8076	0.81971	0.591011
HLA-DRA	0.7951	0.78385	0.852987	0.663216
HLA-DRB5	0.8572	0.7899	0.801176	0.608074
HLA-E	0.0526	0.1054	0.0994211	0.0385444
HLA-F	0.02205	0.05265	0.0321335	0.0265076
HLA-G	0.0156	0.0601	0.0154389	0.0284395
B2M	0.02665	0.02635	0.0500344	0.00816788
TAP1	0.7244	0.62755	0.546687	0.664104
TAP2	0.4812	0.4621	0.368745	0.457792
CANX	0.12795	0.08055	0.141461	0.0278464
CALR	0.02135	0.03295	0.0354614	0.00581504
TAPBP/TPN	0.0991	0.08315	0.14668	0.0409882
PDIA3/Erp57	0.04765	0.063	0.100592	0.0338641
CIITA	0.8807	0.8064	0.704432	0.314603
RFX5	0.0446	0.0727	0.0953744	0.0229155
RFX1	0.01665	0.03635	0.0611277	0.00593448
PSMB9/LMP2	0.43855	0.40705	0.141573	0.0382997
PSMB8/LMP7	0.1316	0.1461	0.419532	0.432477
